# Supplementary material for: Assessment of Heparanase-Mediated Angiogenesis Using Microvascular Endothelial Cells: Identification of λ-Carrageenan Derivative as a Potent Anti Angiogenic Agent
Source: PubMed Central journal article supplement (PMC5450540; doi:10.3390/md15050134), 2017-05-09
Supplement: marinedrugs-15-00134-s001.pdf [file marinedrugs-15-00134-s001.pdf]

# Assessment of Heparanase-Mediated Angiogenesis using Microvascular Endothelial Cells: Identification of $\lambda$ -Carrageenan Derivative as a Potent Anti Angiogenic Agent

Nicolas Poupard <sup>1</sup>, Pamela Badarou <sup>2</sup>, Fabienne Fasani <sup>2</sup>, Hugo Groult <sup>1</sup>, Nicolas Bridiau <sup>1</sup>, Frédéric Sannier <sup>1</sup>, Stéphanie Bordenave-Juchereau <sup>1</sup>, Claudine Kieda <sup>2</sup>, Jean-Marie Piot <sup>1</sup>, Catherine Grillon <sup>2</sup>, Ingrid Fruitier-Arnaudin <sup>1,\*†</sup> and Thierry Maugard <sup>1†</sup>

<sup>1</sup> Université de la Rochelle, UMR CNRS 7266, LIENSs, Equipe Approches Moléculaires, Environnement-Santé, Avenue Michel Crépeau, 17000 La Rochelle, France; nicolas.poupard@univ-lr.fr (N.P.); hugo.groult@univ-lr.fr (H.G.); nicolas.bridiau@univ-lr.fr (N.B.); frederic.sannier@univ-lr.fr (F.S.); stephanie.bordenave@univ-lr.fr (S.B.); jean-marie.piot@univ-lr.fr (J.P.); thierry.maugard@univ-lr.fr (T.M.);

<sup>2</sup> Centre de Biophysique Moléculaire, UPR CNRS 4301, 45071 Orléans, France; ayobadarou@hotmail.fr (P.B.); fabienne.fasani@cnrs-orleans.fr (F.F.); claudine.kieda@cnrs-orleans.fr (C.K.); catherine.grillon@cnrs-orleans.fr (C.G.)

\* Correspondence: ingrid.fruitier@univ-lr.fr (I.F.); Tel.: +33-546-458-562; Fax: +33-546-458-277

† These authors contributed equally to this work.

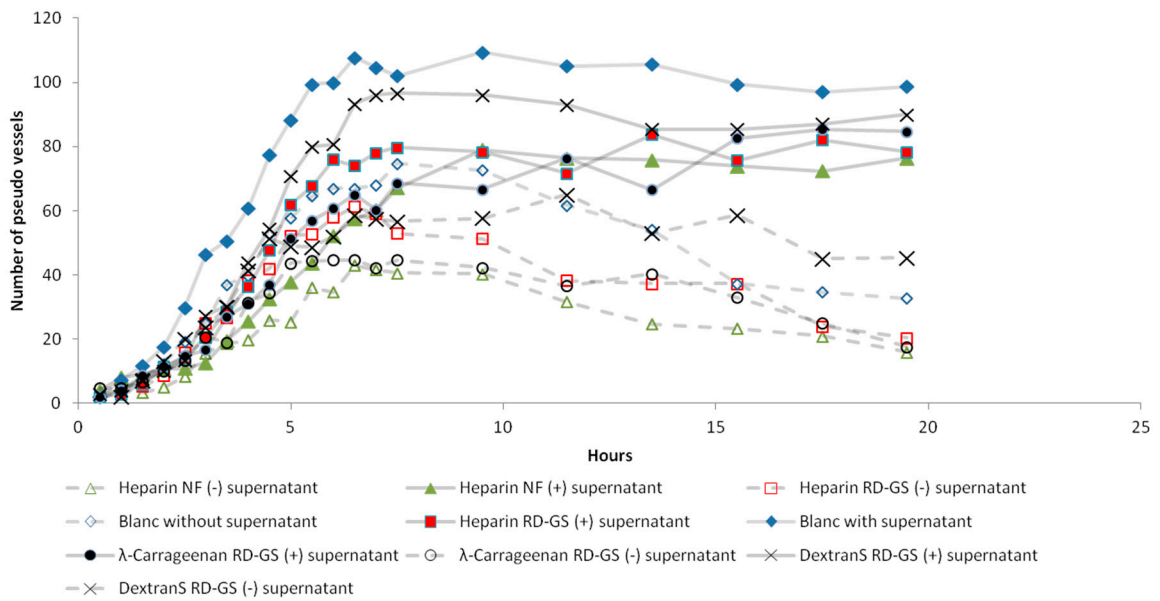

**Figure S1:** Complete Kinetic of the number of pseudo vessels formation from 0h to 20h. Each polysaccharide is described in the conditions with FBS-free medium (-) supernatant) or with medium supplemented with MCF-7 supernatant ((+) supernatant). Each point represent the average value of a triplicate

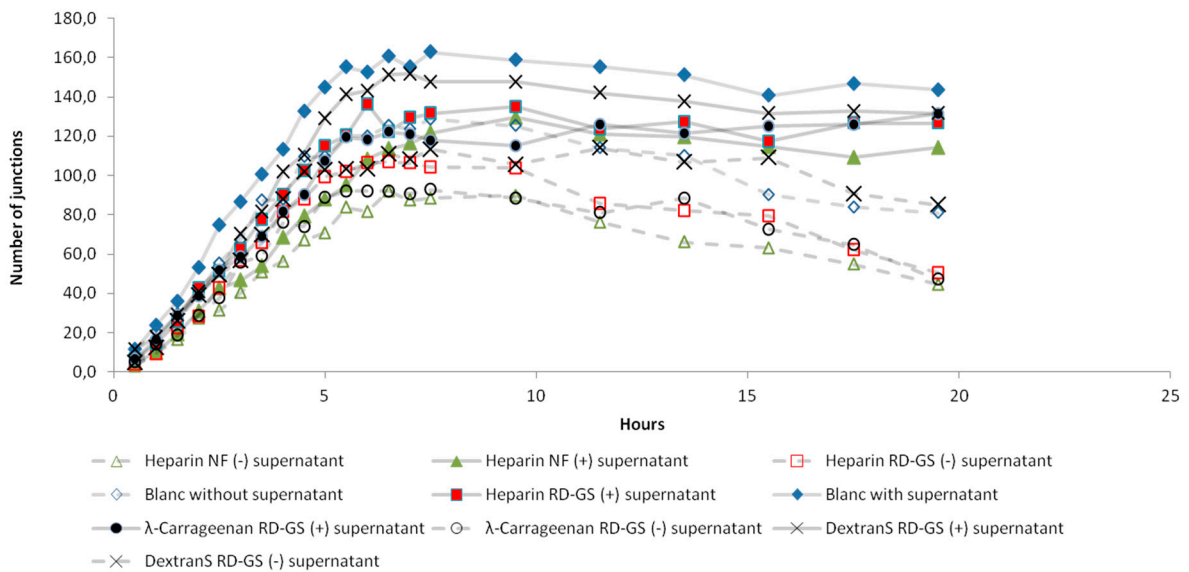

**Figure S2:** Complete Kinetic of the junctions formation from 0h to 20h. Each polysaccharide is described in the conditions with FBS-free medium (-) supernatant) or with medium supplemented with MCF-7 supernatant ((+) supernatant). Each point represent the average value of a triplicate

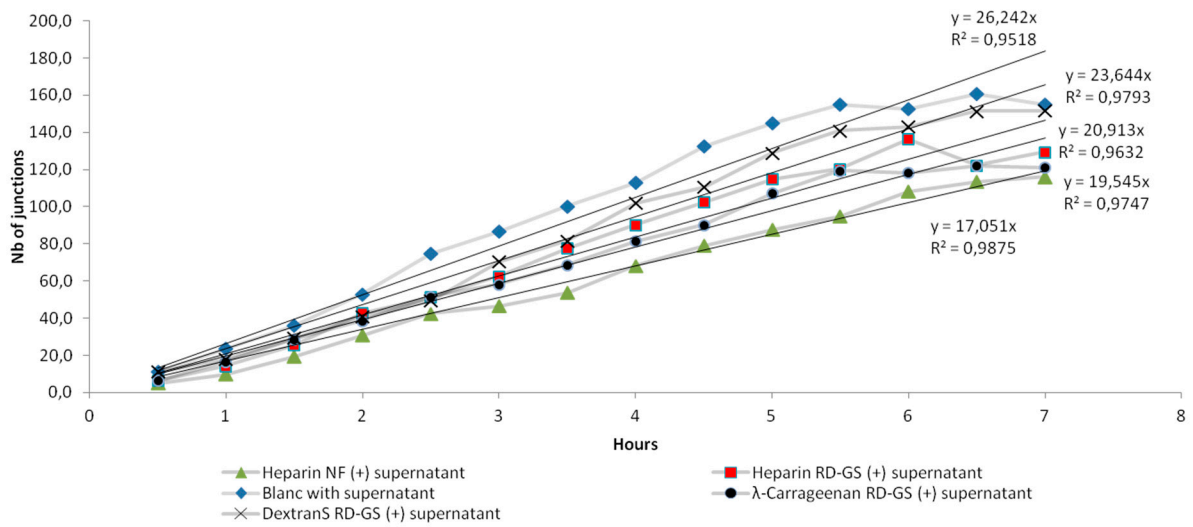

**Figure S3:** Slopes determined with linear regression of the number of junctions formed between 0h and 7h with each polysaccharide tested in medium supplemented with MCF7-supernatant. Each point represent the average value of a triplicate

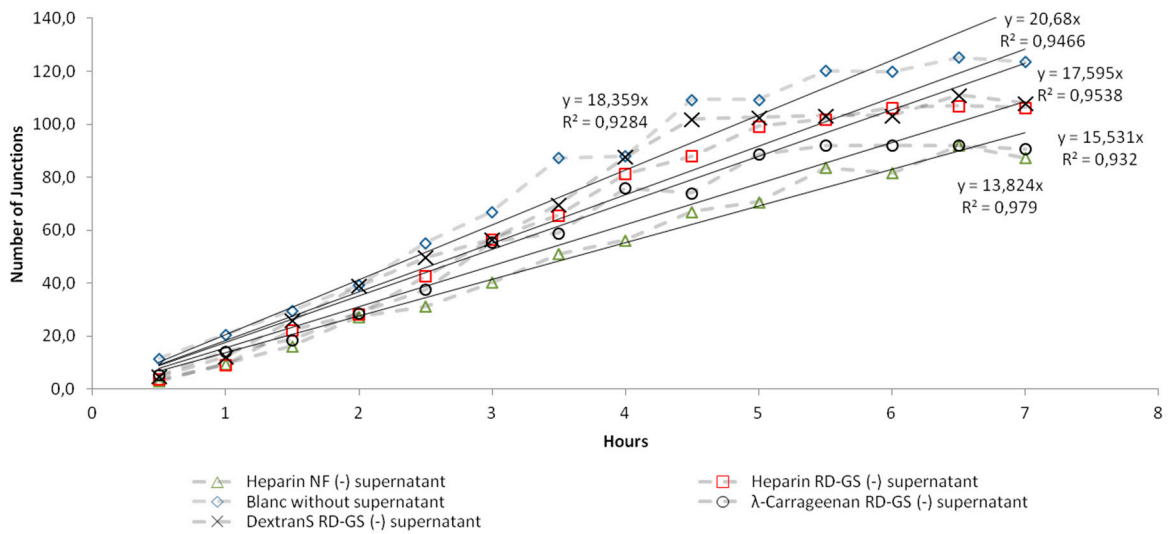

**Figure S4:** Slopes determined with linear regression of the number of junctions formed between 0h and 7h with each polysaccharide tested in FBS-free medium. Each point represent the average value of a triplicate

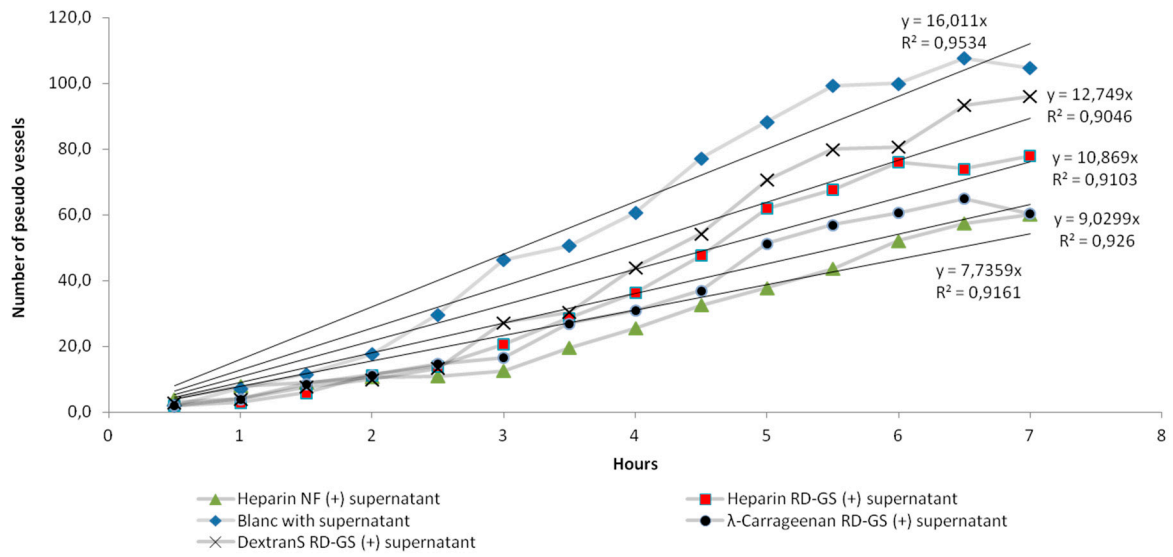

**Figure S5:** Slopes determined with linear regression of the number of pseudo vessels formed between 0h and 7h with each polysaccharide tested in medium supplemented with MCF7-supernatant. Each point represent the average value of a triplicate.

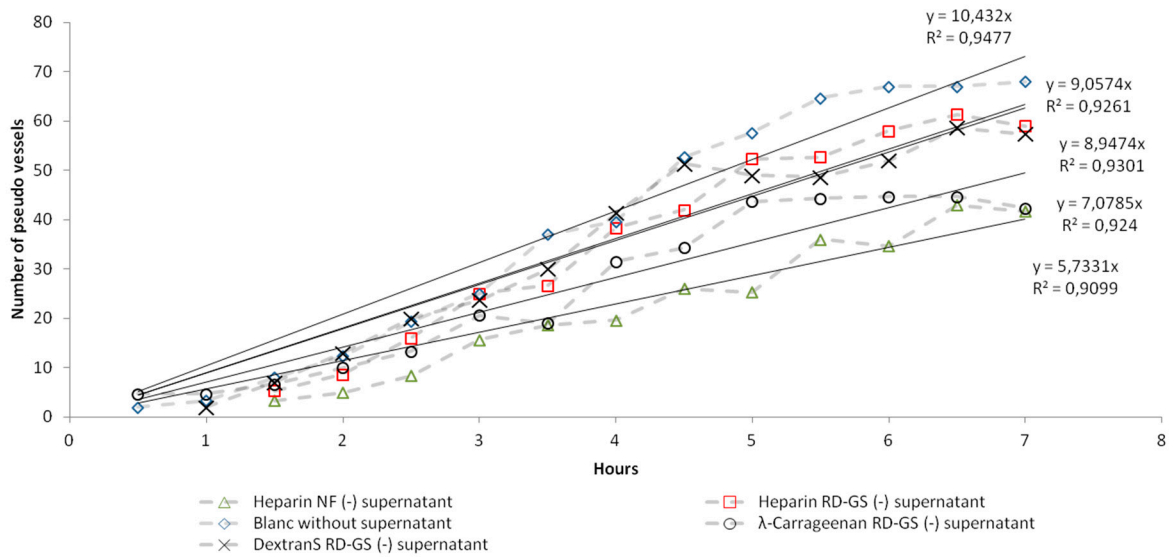

**Figure S6:** Slopes determined with linear regression of the number of pseudo vessels formed between 0h and 7h with each polysaccharide tested in in FBS-free medium. Each point represent the average value of a triplicate
